# Supplementary material
Source: Springer Nature journal article supplement (https://www.springermedizin.de/resource/supplementary/12883_2008_196_MOESM1_ESM.pdf/9457054)

DRS

30  
20  
10  
0

start

max dose

after tapering

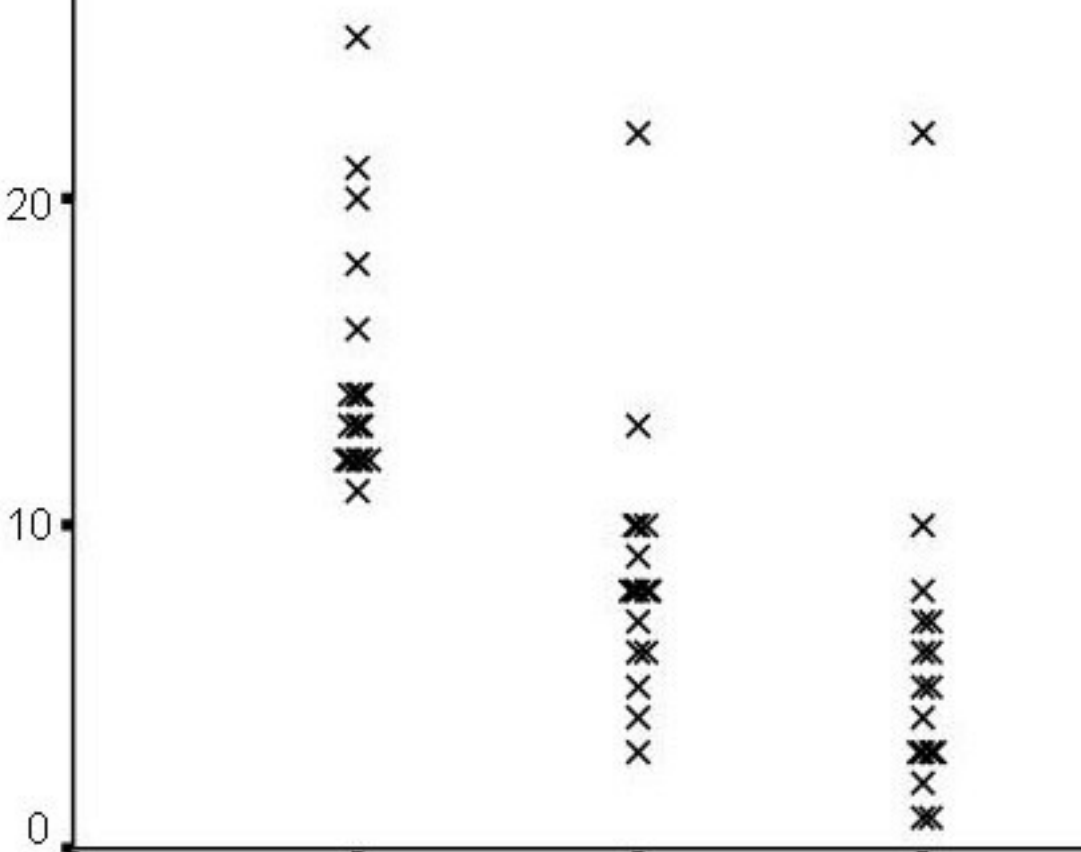

Supplement: MOESM1 [file 9457054]
